# Supplementary material for: Formation of amyloid loops in brain tissues is controlled by the flexibility of protofibril chains
Source: PubMed Central journal article supplement (PMC10214208; doi:10.1073/pnas.2216234120), 2023-05-15
Supplement: pnas.2216234120.sapp.pdf [file pnas.2216234120.sapp.pdf]

## Supporting Information for

### Formation of amyloid loops in brain tissues is controlled by the flexibility of protofibril chains.

Alyssa M. Miller<sup>1</sup>, Jiapeng Wei<sup>1</sup>, Sarah Meehan<sup>1</sup>, Christopher M. Dobson<sup>1</sup>, Mark E. Welland<sup>2</sup>, David Klenerman<sup>1</sup>, Michele Vendruscolo<sup>1</sup>, Francesco S. Ruggeri<sup>1,3,4</sup>, and Tuomas P. J. Knowles<sup>1,5</sup>

<sup>1</sup>Yusuf Hamied Department of Chemistry, University of Cambridge, Cambridge, CB2 1EW, UK

<sup>2</sup>Nanoscience Centre, University of Cambridge, Cambridge, CB3 0FF, UK

<sup>3</sup>Laboratory of Organic Chemistry, Stippeneng, Wageningen University, Wageningen, 6703 WE, Netherlands

<sup>4</sup> Laboratory of Physical Chemistry, Stippeneng, Wageningen University, Wageningen, 6703 WE, Netherlands

<sup>5</sup>Cavendish Laboratory, Department of Physics, University of Cambridge, Cambridge, CB3 0HE, UK

Michele Vendruscolo, Francesco S. Ruggeri, Tuomas P.J. Knowles  
Email: mv254@cam.ac.uk, simone.ruggeri@wur.nl, tpjk2@cam.ac.uk

#### **This PDF file includes:**

Figures S1 to S5

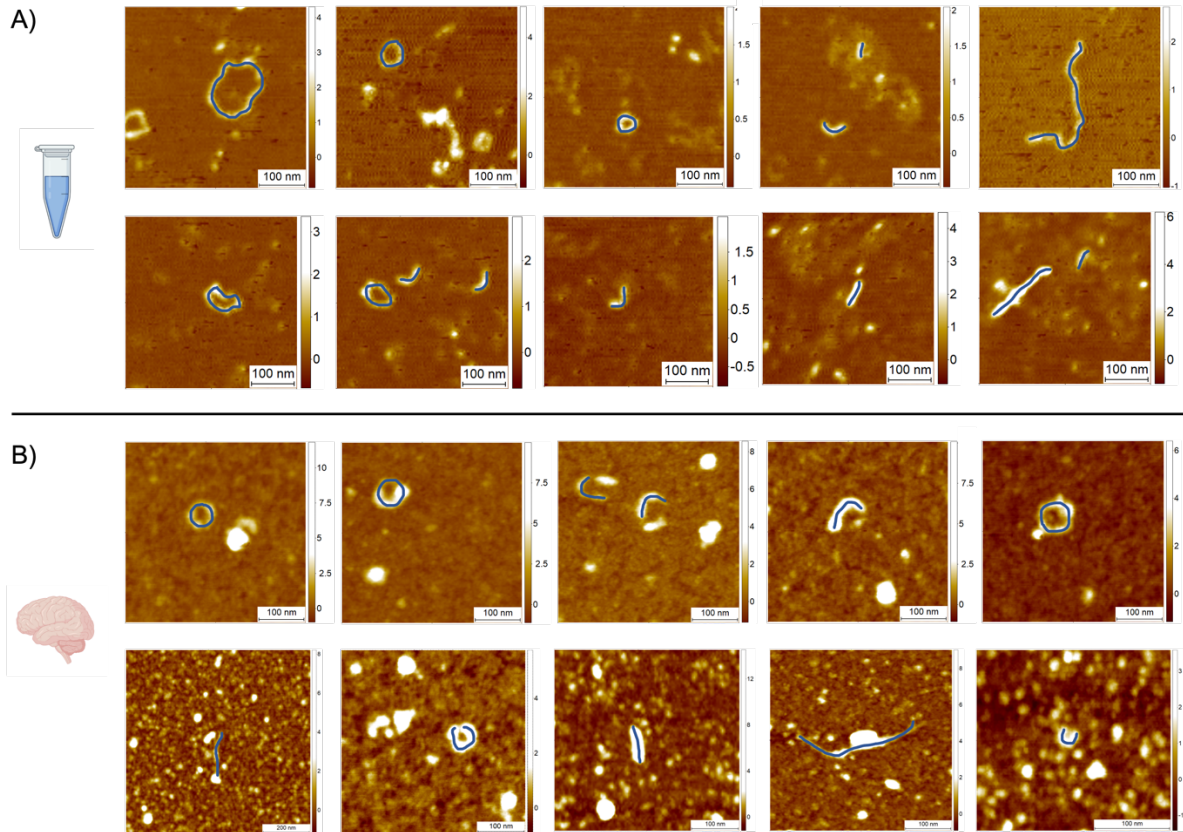

**Fig. S1.** A gallery of examples of open and closed loops of varying length for *in vitro* (A) and *ex vivo* (B) protofibrils. Loops were traced (blue lines) as a visual aid to demonstrate which particles were included in the analysis.

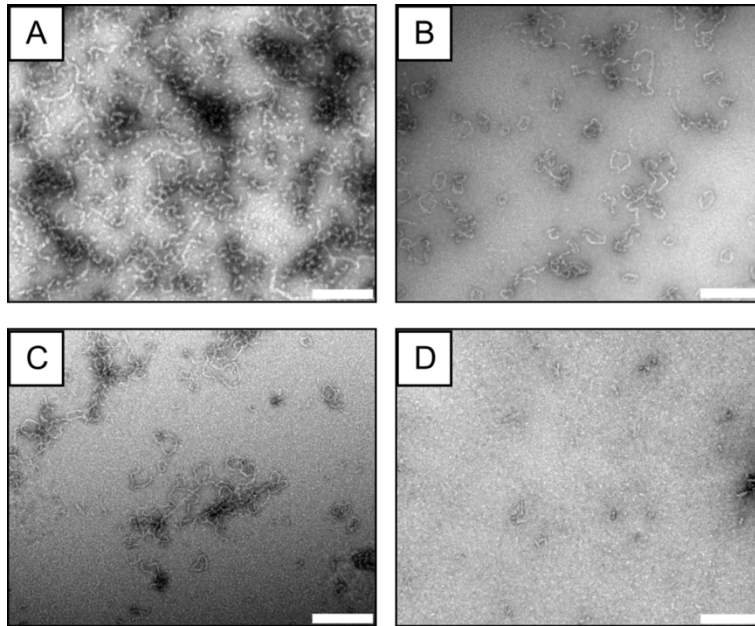

**Fig. S2.** TEM imaging of recombinant  $\alpha$ -lactalbumin aggregates}. (A-D)  $\alpha$ -lactalbumin was imaged via TEM in destabilising conditions after 2 (A), 5 (B), 14 (C), and 72 (D) hours incubation time. Protofibrillar structures are initially observed (A), followed by the observation of closed ring structures (B & C). After prolonged incubation (D), the elongated structures are no longer observed.

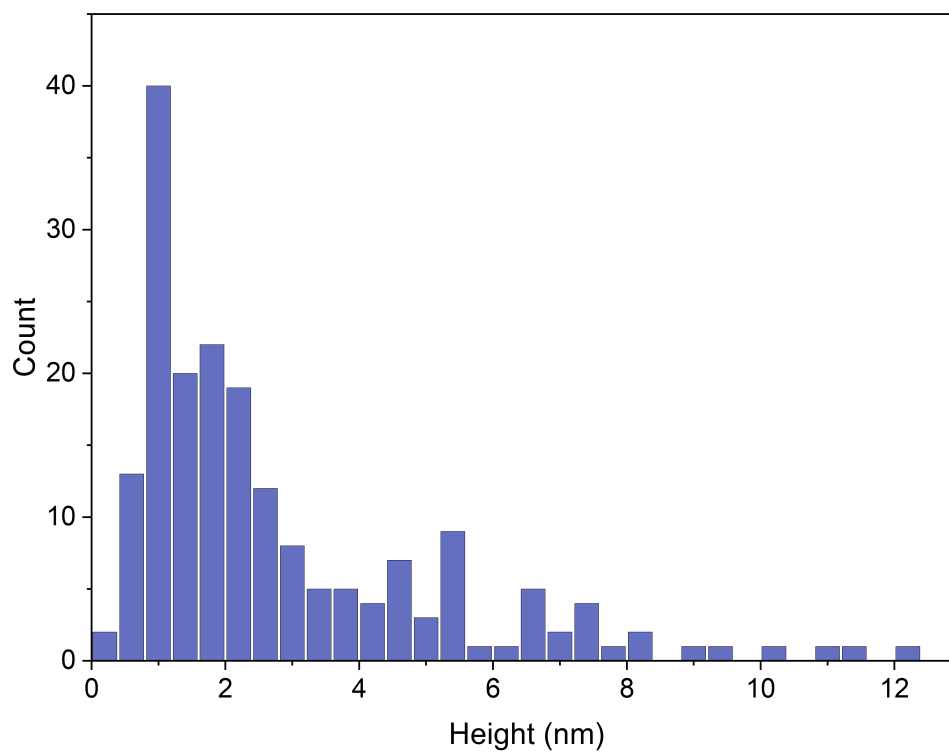

**Fig. S3.** The cross-sectional height distribution for *ex vivo* aggregates was measured using AFM. The mean height was  $2.8 \pm 2.3$  nm ( $n=198$ ).

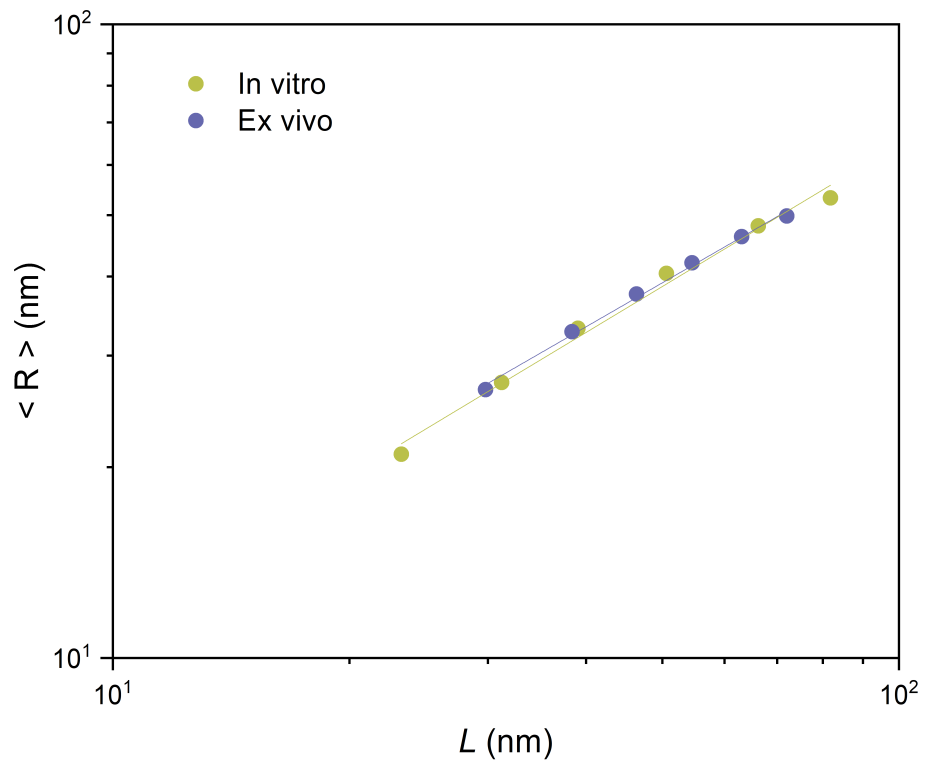

**Fig. S4.** A double logarithmic plot of the end-to-end distance,  $R$ , vs the contour length,  $L$ . The scaling exponent,  $\lambda$ , provides information on the dimension of the system, with  $\lambda = 1, 0.75, 0.588$  for  $D = 1, 2,$  and  $3$  respectively.  $\lambda = 0.72$  for *ex vivo*, and  $\lambda = 0.75$  for *in vitro* protofibrils.

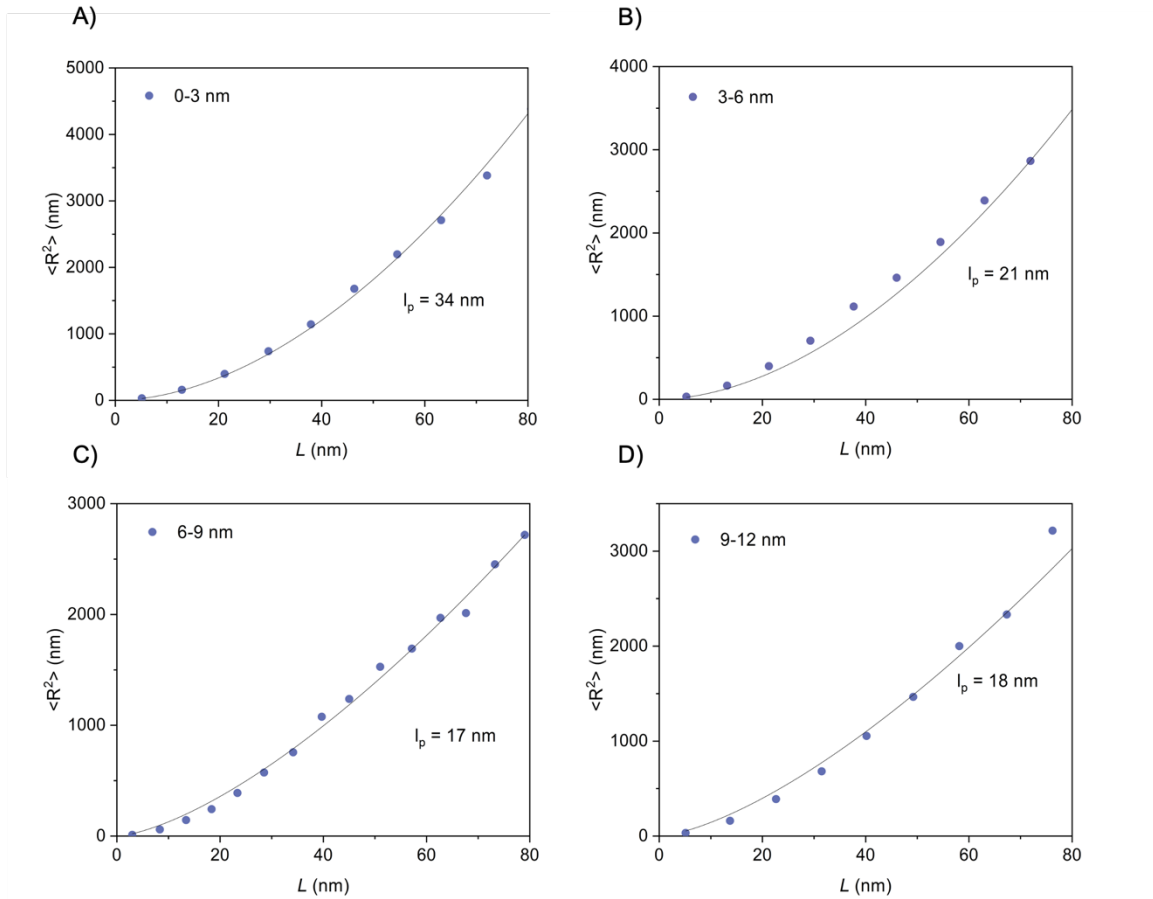

**Fig. S5.** Plots of contour length,  $L$  vs mean squared end-to-end distance,  $\langle R^2 \rangle$  for *ex vivo* protofibrils. Due to the heterogeneous nature of brain samples, it is likely that more than one protein species exists. Analysis was therefore performed in groups corresponding the height of (A) 1 ( $n=137$ ), (B) 2 ( $n=24$ ), (C) 3 ( $n=28$ ), and (D) 4 ( $n=9$ ) individual protofilaments.
